# Supplementary material for: Synthesis of hydrophilic Ag2Se quantum dots optically optimized by multivariate strategies: an easy one-pot approach
Source: Royal Society of Chemistry journal article supplement (doi:10.1039/d2nj03696g), 2022-01-01
Supplement: d2nj03696g1.pdf [file d2nj03696g1.pdf]

Supplementary Information for:

**Synthesis of hydrophilic Ag<sub>2</sub>Se quantum dots optically optimized by multivariate strategies: an easy one-pot approach**

Isabelle M. A. Viegas, Ingrid W. V. Gonçalves, Beate S. Santos, Adriana Fontes, Maria Gorette C. Pereira, Claudete F. Pereira, Giovannia A. L. Pereira

**Table S1** Experimental conditions and results of the syntheses from the 2<sup>4-1</sup> fractional factorial design.

| Synthesis code | MSA/Ag molar ratio | Ag/Se molar ratio | pH   | Temperature (°C) | Time* (min) | $\lambda_{\text{abs}}$ (nm) | $\lambda_{\text{ems}}$ (nm) | $\lambda_{\text{exc}}$ (nm) |
|----------------|--------------------|-------------------|------|------------------|-------------|-----------------------------|-----------------------------|-----------------------------|
| 15.1           | 2:1                | 2:1               | 5.0  | 30               | 20          | 550                         | 655                         | 450                         |
| 15.2           | 2:1                | 2:1               | 5.0  | 30               | 60          | 555                         | 660                         | 450                         |
| 18.1           | 8:1                | 2:1               | 5.0  | 60               | 20          | 355                         | 393                         | 350                         |
| 18.2           | 8:1                | 2:1               | 5.0  | 60               | 60          | 365                         | 393                         | 350                         |
| 14.1           | 2:1                | 10:1              | 5.0  | 60               | 20          | 535                         | 690                         | 450                         |
| 14.2           | 2:1                | 10:1              | 5.0  | 60               | 60          | 540                         | 700                         | 450                         |
| 12.1           | 8:1                | 10:1              | 5.0  | 30               | 20          | 515                         | 708                         | 450                         |
| 12.2           | 8:1                | 10:1              | 5.0  | 30               | 60          | 515                         | 710                         | 450                         |
| 17.1           | 2:1                | 2:1               | 12.0 | 60               | 20          | 300                         | 455                         | 350                         |
| 17.2           | 2:1                | 2:1               | 12.0 | 60               | 60          | 293                         | 455                         | 350                         |
| 13.1           | 8:1                | 2:1               | 12.0 | 30               | 20          | 305                         | 455                         | 350                         |
| 13.2           | 8:1                | 2:1               | 12.0 | 30               | 60          | 305                         | 455                         | 350                         |
| 16.1           | 2:1                | 10:1              | 12.0 | 30               | 20          | 310                         | 455                         | 350                         |
| 16.2           | 2:1                | 10:1              | 12.0 | 30               | 60          | 305                         | 455                         | 350                         |
| 11.1           | 8:1                | 10:1              | 12.0 | 60               | 20          | 305                         | 455                         | 350                         |
| 11.2           | 8:1                | 10:1              | 12.0 | 60               | 60          | 305                         | 455                         | 350                         |

\*Time at which the aliquots were collected.

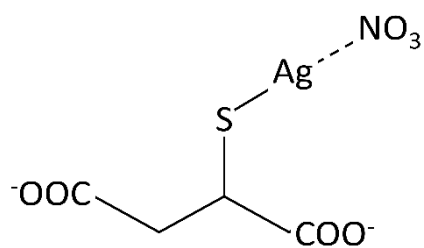

**Figure S1** Structure of the MSA-Ag complex in aqueous solution containing nitrate ions at alkaline pH.

**Table S2** Experimental conditions and results of the syntheses from the mixed-level factorial design.

| <b>Synthesis code</b> | <b>pH</b> | <b>Temperature (°C)</b> | <b>Time* (min)</b> | <b><math>\lambda_{\text{abs}}</math> (nm)</b> | <b><math>\lambda_{\text{ems}}</math> (nm)</b> | <b><math>\lambda_{\text{exc}}</math> (nm)</b> |
|-----------------------|-----------|-------------------------|--------------------|-----------------------------------------------|-----------------------------------------------|-----------------------------------------------|
| 19.1                  | 5.0       | 5                       | 20                 | 595                                           | 816                                           | 484                                           |
| 19.2                  | 5.0       | 5                       | 60                 | 597                                           | 798                                           | 484                                           |
| 21.1                  | 5.0       | 25                      | 20                 | 592                                           | 816                                           | 484                                           |
| 21.2                  | 5.0       | 25                      | 60                 | 592                                           | 819                                           | 484                                           |
| 23.1                  | 5.0       | 45                      | 20                 | 592                                           | 820                                           | 484                                           |
| 23.2                  | 5.0       | 45                      | 60                 | 592                                           | 820                                           | 484                                           |
| 20.1                  | 12.0      | 5                       | 20                 | 305                                           | 456                                           | 350                                           |
| 20.2                  | 12.0      | 5                       | 60                 | 305                                           | 456                                           | 350                                           |
| 22.1                  | 12.0      | 25                      | 20                 | 305                                           | 458                                           | 350                                           |
| 22.2                  | 12.0      | 25                      | 60                 | 305                                           | 455                                           | 350                                           |
| 24.1                  | 12.0      | 45                      | 20                 | 305                                           | 454                                           | 350                                           |
| 24.2                  | 12.0      | 45                      | 60                 | 305                                           | 451                                           | 350                                           |

\*Time at which the aliquots were collected.

**Table S3** Experimental conditions and results of the syntheses from the 2<sup>4</sup> full factorial design.

| Synthesis code | MSA/Ag molar ratio | Ag/Se molar ratio | pH   | Temperature (°C) | Time* (min) | PL intensity (a. u.) | $\lambda_{\text{abs}}$ (nm) | $\lambda_{\text{ems}}$ (nm) | $\lambda_{\text{exc}}$ (nm) |
|----------------|--------------------|-------------------|------|------------------|-------------|----------------------|-----------------------------|-----------------------------|-----------------------------|
| 31.1           | 2:1                | 2:1               | 5.0  | 5                | 20          | 0                    | 560                         | –                           | 450                         |
| 31.2           | 2:1                | 2:1               | 5.0  | 5                | 60          | 0                    | 560                         | –                           | 450                         |
| 41.1           | 2:1                | 2:1               | 5.0  | 5                | 20          | 0                    | 555                         | –                           | 450                         |
| 41.2           | 2:1                | 2:1               | 5.0  | 5                | 60          | 0                    | 545                         | –                           | 450                         |
| 30.1           | 6:1                | 2:1               | 5.0  | 5                | 20          | 23                   | 600                         | 812                         | 450                         |
| 30.2           | 6:1                | 2:1               | 5.0  | 5                | 60          | 23                   | 600                         | 812                         | 450                         |
| 36.1           | 2:1                | 8:1               | 5.0  | 5                | 20          | 0                    | 510                         | –                           | 450                         |
| 36.2           | 2:1                | 8:1               | 5.0  | 5                | 60          | 0                    | 510                         | –                           | 450                         |
| 25.1           | 6:1                | 8:1               | 5.0  | 5                | 20          | 51                   | 515                         | 740                         | 450                         |
| 25.2           | 6:1                | 8:1               | 5.0  | 5                | 60          | 48                   | 515                         | 732                         | 450                         |
| 39.1           | 2:1                | 2:1               | 5.0  | 60               | 20          | 0                    | 590                         | –                           | 450                         |
| 39.2           | 2:1                | 2:1               | 5.0  | 60               | 60          | 0                    | 590                         | –                           | 450                         |
| 33.1           | 6:1                | 2:1               | 5.0  | 60               | 20          | 0                    | 540                         | –                           | 450                         |
| 33.2           | 6:1                | 2:1               | 5.0  | 60               | 60          | 0                    | 540                         | –                           | 450                         |
| 32.1           | 2:1                | 8:1               | 5.0  | 60               | 20          | 39                   | 550                         | 735                         | 450                         |
| 32.2           | 2:1                | 8:1               | 5.0  | 60               | 60          | 59                   | 565                         | 737                         | 450                         |
| 37.1           | 6:1                | 8:1               | 5.0  | 60               | 20          | 168                  | 580                         | 790                         | 450                         |
| 37.2           | 6:1                | 8:1               | 5.0  | 60               | 60          | 142                  | 585                         | 795                         | 450                         |
| 29.1           | 2:1                | 2:1               | 12.0 | 5                | 20          | 82                   | 295                         | 415                         | 305                         |
| 29.2           | 2:1                | 2:1               | 12.0 | 5                | 60          | 23                   | 298                         | 420                         | 305                         |
| 40.1           | 6:1                | 2:1               | 12.0 | 5                | 20          | 113                  | 305                         | 425                         | 308                         |
| 40.2           | 6:1                | 2:1               | 12.0 | 5                | 60          | 110                  | 305                         | 425                         | 308                         |
| 38.1           | 2:1                | 8:1               | 12.0 | 5                | 20          | 526                  | 296                         | 418                         | 308                         |
| 38.2           | 2:1                | 8:1               | 12.0 | 5                | 60          | 897                  | 296                         | 418                         | 308                         |
| 28.1           | 6:1                | 8:1               | 12.0 | 5                | 20          | 157                  | 305                         | 425                         | 308                         |
| 28.2           | 6:1                | 8:1               | 12.0 | 5                | 60          | 104                  | 305                         | 425                         | 308                         |
| 27.1           | 2:1                | 2:1               | 12.0 | 60               | 20          | 70                   | 305                         | 420                         | 308                         |
| 27.2           | 2:1                | 2:1               | 12.0 | 60               | 60          | 220                  | 293                         | 420                         | 308                         |
| 35.1           | 6:1                | 2:1               | 12.0 | 60               | 20          | 0                    | 305                         | –                           | 305                         |
| 35.2           | 6:1                | 2:1               | 12.0 | 60               | 60          | 64                   | 305                         | 425                         | 305                         |
| 26.1           | 2:1                | 8:1               | 12.0 | 60               | 20          | 67                   | 305                         | 420                         | 308                         |
| 26.2           | 2:1                | 8:1               | 12.0 | 60               | 60          | 453                  | 293                         | 420                         | 308                         |
| 34.1           | 6:1                | 8:1               | 12.0 | 60               | 20          | 0                    | 305                         | –                           | 350                         |
| 34.2           | 6:1                | 8:1               | 12.0 | 60               | 60          | 0                    | 305                         | –                           | 350                         |
| 42.1           | 6:1                | 8:1               | 12.0 | 60               | 20          | 0                    | 300                         | –                           | 308                         |
| 42.2           | 6:1                | 8:1               | 12.0 | 60               | 60          | 0                    | 300                         | –                           | 308                         |

\*Time at which the aliquots were collected.

**Table S4** Experimental conditions and results of the syntheses from the 2<sup>3</sup> full factorial design.

| Synthesis code | MSA/Ag molar ratio | pH  | Temperature (°C) | Time* (min) | PL intensity (a. u.)** | $\lambda_{\text{abs}}$ (nm) | $\lambda_{\text{ems}}$ (nm) |
|----------------|--------------------|-----|------------------|-------------|------------------------|-----------------------------|-----------------------------|
| 43.1           | 5:1                | 5.0 | 40               | 20          | 21                     | 580                         | 793                         |
| 43.2           | 5:1                | 5.0 | 40               | 60          | 22                     | 577                         | 763                         |
| 51.1           | 7:1                | 5.0 | 40               | 20          | 71                     | 567                         | 805                         |
| 51.2           | 7:1                | 5.0 | 40               | 60          | 72                     | 567                         | 811                         |
| 44.1           | 5:1                | 7.0 | 40               | 20          | 0                      | 692                         | –                           |
| 44.2           | 5:1                | 7.0 | 40               | 60          | 0                      | 692                         | –                           |
| 46.1           | 7:1                | 7.0 | 40               | 20          | 0                      | 550                         | –                           |
| 46.2           | 7:1                | 7.0 | 40               | 60          | 0                      | 550                         | –                           |
| 49.1           | 6:1                | 6.0 | 60               | 20          | 17                     | 564                         | 723                         |
| 49.2           | 6:1                | 6.0 | 60               | 60          | 11                     | 573                         | 730                         |
| 53.1           | 5:1                | 5.0 | 80               | 20          | 47                     | 590                         | 815                         |
| 53.2           | 5:1                | 5.0 | 80               | 60          | 44                     | 590                         | 825                         |
| 45.1           | 7:1                | 5.0 | 80               | 20          | 87                     | 578                         | 789                         |
| 45.2           | 7:1                | 5.0 | 80               | 60          | 69                     | 575                         | 809                         |
| 47.1           | 5:1                | 7.0 | 80               | 20          | 0                      | 694                         | –                           |
| 47.2           | 5:1                | 7.0 | 80               | 60          | 0                      | 712                         | –                           |
| 48.1           | 7:1                | 7.0 | 80               | 20          | 0                      | 805                         | –                           |
| 48.2           | 7:1                | 7.0 | 80               | 60          | 0                      | 805                         | –                           |

\*Time at which the aliquots were collected.

\*\*All PL spectra were obtained with excitation at 460 nm.

**Table S5** Effect estimates summary for the results of the PL intensity of Ag<sub>2</sub>Se QDs obtained from the 2<sup>3</sup> full factorial design.

| <b>Factor</b>          | <b>Effect</b> | <b>Standard error × t</b> | <b>-95% Confidence limit</b> | <b>+95% Confidence limit</b> |
|------------------------|---------------|---------------------------|------------------------------|------------------------------|
| Mean                   | 25.61         | 2.42                      | 23.19                        | 28.03                        |
| (1)MSA/Ag molar ratio* | 20.63         | 5.13                      | 15.49                        | 25.76                        |
| (2)pH*                 | -54.13        | 5.13                      | -59.26                       | -48.99                       |
| (3)Temperature*        | 7.63          | 5.13                      | 2.49                         | 12.76                        |
| 1x2*                   | -20.63        | 5.13                      | -25.76                       | -15.49                       |
| 1x3                    | -4.38         | 5.13                      | -9.51                        | 0.76                         |
| 2x3*                   | -7.62         | 5.13                      | -12.76                       | -2.49                        |
| 1x2x3                  | 4.38          | 5.13                      | -0.76                        | 9.51                         |

\*Statistically significant factor at 95% confidence level

The main effects of the three factors and the interactions between MSA/Ag molar ratio and pH (interaction 1x2) and between pH and temperature (interaction 2x3) were statistically significant. The effect of pH was the greatest, followed by the effect of MSA/Ag molar ratio. According to the effect estimates, the conditions of the 2<sup>3</sup> factorial design that led to increasing the PL intensity are MSA/Ag molar ratio and temperature at their upper levels (7:1 and 80 °C, respectively) and pH at its lower level (5.0). These conditions correspond to those of syntheses 45.1 and 45.2, whose PL intensities were 87 and 69 a. u., respectively. The absorption and PL spectra of the Ag<sub>2</sub>Se QDs obtained in synthesis 45.1 are depicted in Figure S2.

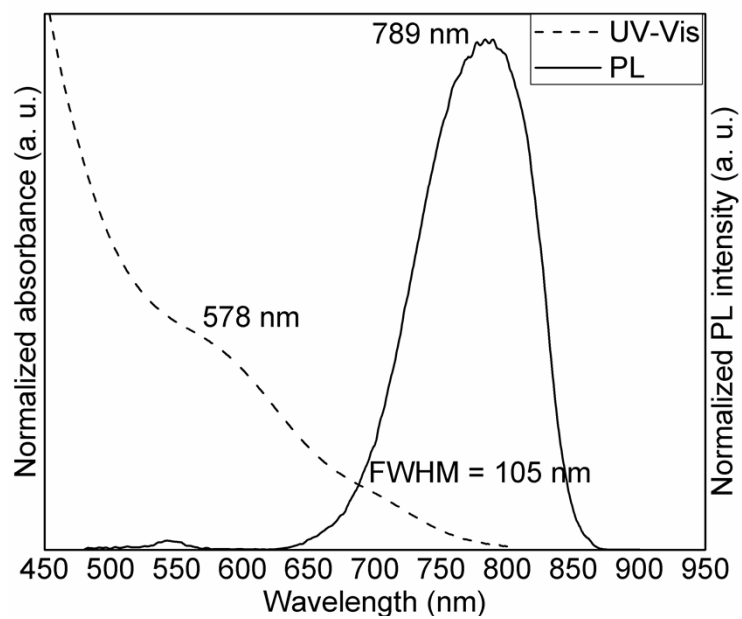

**Figure S2** UV-vis absorption and PL spectra ( $\lambda_{exc} = 460$  nm) of a suspension of MSA–Ag<sub>2</sub>Se quantum dots obtained at 80 °C and pH 5.0, with MSA/Ag and Ag/Se molar ratios of 7:1 and 8:1, respectively, and stirring for 20 min.

**Table S6** Optical features of Ag<sub>2</sub>Se quantum dots synthesized under optimal experimental conditions: MSA/Ag molar ratio of 6:1, Ag/Se molar ratio of 8:1, pH 5.0, and stirring for 20 minutes at 60 °C.

| <b>Suspension</b> | <b>PL intensity (a. u.)</b> | <b><math>\lambda_{\text{abs}}</math> (nm)</b> | <b><math>\lambda_{\text{ems}}</math> (nm)</b> | <b>PL FWHM (nm)</b> |
|-------------------|-----------------------------|-----------------------------------------------|-----------------------------------------------|---------------------|
| A                 | 168                         | 580                                           | 790                                           | 103                 |
| B                 | 66                          | 582                                           | 768                                           | 122                 |
| C                 | 113                         | 585                                           | 813                                           | 96                  |
| D                 | 93                          | 582                                           | 788                                           | 113                 |
| E                 | 103                         | 586                                           | 785                                           | 113                 |
